# Supplementary material for: A prognostic risk prediction model based on ferroptosis-related long non-coding RNAs in bladder cancer: A bulk RNA-seq research and scRNA-seq validation
Source: PubMed Central journal article supplement — Medicine (Baltimore). 2022 Dec 23;101(51):e32558. doi: 10.1097/MD.0000000000032558 (PMC9794272; doi:10.1097/md.0000000000032558), 2022-12-23
Supplement: medi-101-e32558-s001.pdf [file medi-101-e32558-s001.pdf]

Table S1. Expression matrix of ferroptosis-related genes in BC.

| Ferrotosis-related genes | Name                                                         |
|--------------------------|--------------------------------------------------------------|
| ACSL4                    | acyl-CoA synthetase long-chain family member 4               |
| AKR1C1                   | aldo-keto reductase family 1 member C1                       |
| AKR1C2                   | aldo-keto reductase family 1 member C2                       |
| AKR1C3                   | aldo-keto reductase family 1 member C3                       |
| ALOX15                   | arachidonate 15-lipoxygenase                                 |
| ALOX5                    | arachidonate 5-lipoxygenase                                  |
| ALOX12                   | arachidonate 12-lipoxygenase                                 |
| ATP5MC3                  | ATP synthase membrane subunit c locus 3                      |
| CARS                     | cysteinyl tRNA synthetase                                    |
| CBS                      | cystathion ine beta synthase                                 |
| CD44                     | CD44 molecule                                                |
| CHAC1                    | ChaC glutathione- specific gamma-glutamyl cyclotransferase 1 |
| CISD1                    | CDGSH iron sulfur domain 1                                   |
| CS                       | citrate synthase                                             |
| DPP4                     | dipeptidyl-dippeptidase-4                                    |
| FANCD2                   | Fanconi anemia comple mentation group D2                     |
| GCLC                     | glutamate-cysteine ligase catalytic subunit                  |
| GCLM                     | glutamate-cysteine ligase modifier subunit                   |
| GLS2                     | glutaminase 2                                                |
| GPX4                     | glutathio ne peroxidase 4                                    |
| GSS                      | glutathione synthetase                                       |
| HMGCR                    | 3-hydroxy-3- methylglutaryl-CoA reductase                    |
| HSPB1                    | heat shock protein beta 1                                    |
| CRYAB                    | heat shock protein beta 5                                    |
| LPCAT3                   | lysophosp hatidylcholine acyltransferase 3                   |
| MT1G                     | metallothionein-1G                                           |
| NCOA4                    | nuclear receptor coactiva tor 4                              |
| PTGS2                    | prostagla ndin-endoperoxide synthase 2                       |
| RPL8                     | ribosomal protein L8                                         |
| SAT1                     | spermidine/spermine N1-acetyltra nsferase 1                  |
| SLC7A11                  | solute carrier family 7 member 11                            |
| FDFT1                    | farnesyl-diphosphate farnesyltransferase 1                   |
| TFRC                     | transferrin receptor                                         |
| TP53                     | tumor protein 53                                             |
| EMC2                     | ER membrane protein complex subunit 2                        |
| AIFM2                    | apoptosis inducing factor mitochondria associated 2          |
| PHKG2                    | phospho rylase kinase ,g2                                    |
| HSBP1                    | heat-shock 27-k Da protein 1                                 |
| ACO1                     | aconitase 1                                                  |
| FTH1                     | ferritin heavy chain 1                                       |

---

|        |                                                    |
|--------|----------------------------------------------------|
| STEAP3 | six-transmembrane epithelial antigen of prostate 3 |
| NFS1   | cysteine desulfurase                               |
| ACSL3  | acyl-CoA synthetase long-chain family member 3     |
| ACACA  | Acetyl-CoA carboxylase alpha                       |
| PEBP1  | phosphatidylethanolamine-binding protein 1         |
| ZEB1   | zinc finger E-box-binding homeobox 1               |
| SQLE   | squalene monooxygenase                             |
| FADS2  | fatty acid desaturase 2/acyl-CoA 6-desaturase      |
| NFE2L2 | nuclear factor, erythroid 2 like 2                 |
| KEAP1  | kelch-like ECH-associated protein 1                |
| NQO1   | quinone oxidoreductase 1                           |
| NOX1   | NADPH oxidase 1                                    |
| ABCC1  | ATP binding cassette subfamily C member 1          |
| SLC1A5 | solute carrier family 1 member 5                   |
| GOT1   | glutamic-oxaloacetic transaminase 1                |
| G6PD   | glucose-6-phosphate dehydrogenase                  |
| PGD    | phosphoglycerate dehydrogenase                     |
| IREB2  | iron response element-binding protein 2            |
| HMOX1  | heme oxygenase 1                                   |
| ACSF2  | acyl-CoA synthetase family member 2                |

---
