# Supplementary material for: A prognostic risk prediction model based on ferroptosis-related long non-coding RNAs in bladder cancer: A bulk RNA-seq research and scRNA-seq validation
Source: PubMed Central journal article supplement — Medicine (Baltimore). 2022 Dec 23;101(51):e32558. doi: 10.1097/MD.0000000000032558 (PMC9794272; doi:10.1097/md.0000000000032558), 2022-12-23
Supplement: medi-101-e32558-s002.pdf [file medi-101-e32558-s002.pdf]

Table S2. Univariate Cox analysis results of ferroptosis-related lncRNAs based on survival length.

| gene       | KM     | B        | SE     | HR    | HR.9  | HR.9  | pvalue |
|------------|--------|----------|--------|-------|-------|-------|--------|
| AC007566.1 | 0.0165 | -0.00892 | 0.0042 | 0.991 | 0.982 | 0.999 | 0.0378 |
| MCF2L-AS1  | 0.0179 | -0.00206 | 0.0007 | 0.997 | 0.996 | 0.999 | 0.0051 |
| AC006557.1 | 1.82E- | -0.02659 | 0.0111 | 0.973 | 0.952 | 0.995 | 0.0168 |
| ITPR1-DT   | 0.0023 | -0.0198  | 0.0059 | 0.980 | 0.969 | 0.991 | 0.0008 |
| AL158071.2 | 0.0015 | -0.02718 | 0.0092 | 0.973 | 0.955 | 0.990 | 0.0031 |
| AC103760.1 | 0.0035 | -0.00934 | 0.0031 | 0.990 | 0.984 | 0.996 | 0.0030 |
| AC096586.2 | 0.0003 | -0.0336  | 0.0108 | 0.966 | 0.946 | 0.987 | 0.0019 |
| IQCH-AS1   | 0.0060 | -0.00111 | 0.0004 | 0.998 | 0.998 | 0.999 | 0.0115 |
| PRKCZ-AS1  | 0.0145 | -0.00207 | 0.0009 | 0.997 | 0.995 | 0.999 | 0.0360 |
| AL591895.1 | 0.0038 | -0.00179 | 0.0006 | 0.998 | 0.996 | 0.999 | 0.0041 |

---

|            |        |          |        |       |       |       |        |
|------------|--------|----------|--------|-------|-------|-------|--------|
| AL356740.1 | 0.0248 | -0.007   | 0.0020 | 0.993 | 0.988 | 0.997 | 0.0008 |
| SNHG15     | 0.0091 | -0.00041 | 0.0001 | 0.999 | 0.999 | 0.999 | 0.0026 |
| AC010976.1 | 0.0083 | -0.0055  | 0.0024 | 0.994 | 0.989 | 0.999 | 0.0245 |
| LINC02325  | 0.0179 | -0.06765 | 0.0329 | 0.934 | 0.876 | 0.997 | 0.0403 |
| AL109811.1 | 0.0058 | -0.02929 | 0.0096 | 0.971 | 0.952 | 0.989 | 0.0023 |
| AL049780.1 | 0.0068 | -0.04035 | 0.0184 | 0.960 | 0.926 | 0.995 | 0.0286 |
| AC232271.1 | 0.0007 | -0.00337 | 0.0012 | 0.996 | 0.994 | 0.999 | 0.0081 |
| AC074117.1 | 0.0024 | -0.00133 | 0.0004 | 0.998 | 0.997 | 0.999 | 0.0013 |
| AC020765.2 | 4.23E- | -0.01177 | 0.0039 | 0.988 | 0.980 | 0.995 | 0.0029 |
| AC145285.6 | 0.0012 | -0.01217 | 0.0041 | 0.987 | 0.979 | 0.996 | 0.0034 |
| AL133410.1 | 6.39E- | -0.01361 | 0.0035 | 0.986 | 0.979 | 0.993 | 0.0001 |

---

---

|            |        |          |        |       |       |       |        |
|------------|--------|----------|--------|-------|-------|-------|--------|
| PRMT5-AS1  | 0.0130 | -0.01939 | 0.0083 | 0.980 | 0.964 | 0.996 | 0.0198 |
| AL390719.2 | 0.0002 | -0.00057 | 0.0002 | 0.999 | 0.998 | 0.999 | 0.0222 |
| AL133551.1 | 0.0077 | -0.03077 | 0.0130 | 0.969 | 0.945 | 0.994 | 0.0185 |
| AC092287.1 | 0.0268 | -0.02008 | 0.0088 | 0.980 | 0.963 | 0.997 | 0.0238 |
| FOXC2-AS1  | 0.0001 | 0.012059 | 0.0046 | 1.012 | 1.002 | 1.021 | 0.0099 |
| AL357140.2 | 0.0035 | -0.03439 | 0.0133 | 0.966 | 0.941 | 0.991 | 0.0097 |
| AC090186.1 | 0.0157 | -0.07326 | 0.0293 | 0.929 | 0.877 | 0.984 | 0.0125 |
| THAP9-AS1  | 0.0021 | -0.00037 | 0.0001 | 0.999 | 0.999 | 0.999 | 0.0010 |
| AL023284.4 | 0.0104 | -0.00185 | 0.0007 | 0.998 | 0.996 | 0.999 | 0.0106 |
| AL583856.2 | 0.0044 | -0.04896 | 0.0142 | 0.952 | 0.926 | 0.979 | 0.0005 |
| AC005954.1 | 0.0258 | -0.11083 | 0.0433 | 0.895 | 0.822 | 0.974 | 0.0104 |

---

---

|             |        |          |        |       |       |       |        |
|-------------|--------|----------|--------|-------|-------|-------|--------|
| AC009779.2  | 0.0443 | -0.00129 | 0.0005 | 0.998 | 0.997 | 0.999 | 0.0189 |
| AC109347.1  | 0.0001 | -0.00929 | 0.0030 | 0.990 | 0.984 | 0.996 | 0.0025 |
| AC002398.1  | 0.0085 | -0.00603 | 0.0022 | 0.993 | 0.989 | 0.998 | 0.0067 |
| AL031775.1  | 6.97E- | -0.01065 | 0.0022 | 0.989 | 0.985 | 0.993 | 3.01E- |
| AC022762.2  | 0.0211 | -0.00861 | 0.0039 | 0.991 | 0.983 | 0.999 | 0.0275 |
| AC010618.2  | 0.0028 | -0.03447 | 0.0103 | 0.966 | 0.946 | 0.985 | 0.0008 |
| ZNF213-AS1  | 0.0001 | -0.00142 | 0.0004 | 0.998 | 0.997 | 0.999 | 0.0012 |
| N4BP2L2-IT2 | 0.0009 | -0.00287 | 0.0010 | 0.997 | 0.994 | 0.999 | 0.0088 |
| AC104532.2  | 0.0016 | -0.02186 | 0.0059 | 0.978 | 0.967 | 0.989 | 0.0002 |
| AL355490.2  | 0.0330 | -0.08872 | 0.0313 | 0.915 | 0.860 | 0.973 | 0.0047 |
| AL139089.1  | 0.0012 | -0.00962 | 0.0025 | 0.990 | 0.985 | 0.995 | 0.0001 |

---

---

|            |        |          |        |       |       |       |        |
|------------|--------|----------|--------|-------|-------|-------|--------|
| AC026333.4 | 0.0008 | -0.01625 | 0.0068 | 0.983 | 0.970 | 0.997 | 0.0175 |
| STX18-AS1  | 0.0058 | -0.0052  | 0.0020 | 0.994 | 0.990 | 0.998 | 0.0094 |
| PAXIP1-AS2 | 0.0067 | -0.00201 | 0.0008 | 0.997 | 0.996 | 0.999 | 0.0159 |
| AC096992.2 | 0.0278 | -0.00398 | 0.0020 | 0.996 | 0.992 | 0.999 | 0.0485 |
| AC015871.3 | 0.0122 | -0.00269 | 0.0011 | 0.997 | 0.995 | 0.999 | 0.0196 |
| AL096870.2 | 0.0367 | -0.00751 | 0.0028 | 0.992 | 0.986 | 0.998 | 0.0089 |
| AP001922.6 | 0.0437 | -0.03327 | 0.0125 | 0.967 | 0.943 | 0.991 | 0.0081 |
| AC108860.2 | 0.0291 | -0.00138 | 0.0006 | 0.998 | 0.997 | 0.999 | 0.0244 |
| AL008582.1 | 0.0028 | -0.0348  | 0.0104 | 0.965 | 0.946 | 0.985 | 0.0008 |
| AC092171.4 | 0.0009 | -0.01002 | 0.0039 | 0.990 | 0.982 | 0.997 | 0.0116 |
| AC006160.1 | 0.0006 | -0.07495 | 0.0212 | 0.927 | 0.889 | 0.967 | 0.0004 |

---

---

|            |        |          |        |       |       |       |        |
|------------|--------|----------|--------|-------|-------|-------|--------|
| AC005014.2 | 3.63E- | -0.03087 | 0.0087 | 0.969 | 0.953 | 0.986 | 0.0004 |
| ARRDC1-AS1 | 0.0105 | -0.00092 | 0.0003 | 0.999 | 0.998 | 0.999 | 0.0047 |
| LINC01311  | 0.0003 | -0.00547 | 0.0019 | 0.994 | 0.990 | 0.998 | 0.0044 |
| C5orf56    | 0.0005 | -0.00153 | 0.0005 | 0.998 | 0.997 | 0.999 | 0.0033 |
| AC073655.2 | 0.0059 | -0.01292 | 0.0043 | 0.987 | 0.978 | 0.995 | 0.0031 |
| LINC00240  | 0.0139 | -0.00417 | 0.0014 | 0.995 | 0.993 | 0.998 | 0.0038 |
| AC018648.1 | 0.0231 | -0.02469 | 0.0122 | 0.975 | 0.952 | 0.999 | 0.0438 |
| AL121832.3 | 0.0113 | -0.00376 | 0.0018 | 0.996 | 0.992 | 0.999 | 0.0457 |
| AC011481.1 | 0.0292 | -0.02192 | 0.0086 | 0.978 | 0.961 | 0.995 | 0.0112 |
| RAD51-AS1  | 0.0070 | -0.00197 | 0.0006 | 0.998 | 0.996 | 0.999 | 0.0036 |
| AC009120.2 | 6.81E- | -0.00287 | 0.0007 | 0.997 | 0.995 | 0.998 | 5.61E- |

---

---

|            |        |          |        |       |       |       |        |
|------------|--------|----------|--------|-------|-------|-------|--------|
| SPINT1-AS1 | 0.0211 | -0.00036 | 0.0001 | 0.999 | 0.999 | 0.999 | 0.0404 |
| Z83847.1   | 0.0124 | -0.06608 | 0.0284 | 0.936 | 0.885 | 0.989 | 0.0202 |
| AC079174.2 | 0.0061 | -0.01169 | 0.0034 | 0.988 | 0.981 | 0.995 | 0.0007 |
| AC005261.1 | 0.0009 | -0.00058 | 0.0001 | 0.999 | 0.999 | 0.999 | 6.90E- |
| AC113139.1 | 0.0099 | -0.0931  | 0.0261 | 0.911 | 0.865 | 0.959 | 0.0003 |
| AL512770.1 | 0.0156 | -0.0063  | 0.0024 | 0.993 | 0.988 | 0.998 | 0.0111 |
| IGBP1-AS1  | 0.0494 | -0.03437 | 0.0114 | 0.966 | 0.944 | 0.988 | 0.0027 |
| AC008870.2 | 0.0001 | -0.00601 | 0.0026 | 0.994 | 0.988 | 0.999 | 0.0208 |
| AC008969.1 | 0.0320 | -0.00095 | 0.0004 | 0.999 | 0.998 | 0.999 | 0.0462 |
| AC021016.2 | 0.0024 | -0.00291 | 0.0010 | 0.997 | 0.995 | 0.999 | 0.0037 |
| AL034550.1 | 0.0030 | -0.01482 | 0.0058 | 0.985 | 0.974 | 0.996 | 0.0114 |

---

---

|            |        |          |        |       |       |       |        |
|------------|--------|----------|--------|-------|-------|-------|--------|
| AC012360.3 | 0.0203 | -0.00283 | 0.0011 | 0.997 | 0.994 | 0.999 | 0.0136 |
| Z83851.2   | 0.0144 | -0.00725 | 0.0027 | 0.992 | 0.987 | 0.998 | 0.0082 |
| LINC00324  | 0.0123 | -0.00257 | 0.0008 | 0.997 | 0.995 | 0.999 | 0.0015 |
| AL035461.2 | 0.0015 | -0.00382 | 0.0014 | 0.996 | 0.993 | 0.999 | 0.0098 |
| AC083862.2 | 0.0033 | -0.00947 | 0.0032 | 0.990 | 0.984 | 0.996 | 0.0038 |
| TTC28-AS1  | 0.0021 | -0.00108 | 0.0002 | 0.998 | 0.998 | 0.999 | 8.40E- |
| ZNF436-AS1 | 0.0002 | -0.00152 | 0.0004 | 0.998 | 0.997 | 0.999 | 0.0011 |
| AL355472.1 | 0.0338 | -0.00576 | 0.0018 | 0.994 | 0.990 | 0.997 | 0.0017 |
| AC107068.1 | 0.0016 | -0.00176 | 0.0007 | 0.998 | 0.996 | 0.999 | 0.0148 |
| AC087741.1 | 5.14E- | -0.00134 | 0.0003 | 0.998 | 0.997 | 0.999 | 0.0001 |
| AC025682.1 | 0.0136 | -0.01491 | 0.0056 | 0.985 | 0.974 | 0.996 | 0.0080 |

---



---

|            |        |          |        |       |       |       |        |
|------------|--------|----------|--------|-------|-------|-------|--------|
| AC068338.3 | 0.0209 | -0.01527 | 0.0057 | 0.984 | 0.973 | 0.995 | 0.0075 |
| AL024508.2 | 0.0057 | -0.00262 | 0.0008 | 0.997 | 0.995 | 0.999 | 0.0018 |
| ZNF528-AS1 | 0.0115 | -0.00081 | 0.0002 | 0.999 | 0.998 | 0.999 | 0.0013 |
| AC007383.2 | 0.0473 | -0.00318 | 0.0013 | 0.996 | 0.994 | 0.999 | 0.0182 |
| AC012186.2 | 0.0212 | -0.02574 | 0.0116 | 0.974 | 0.952 | 0.997 | 0.0275 |
| AC007686.3 | 0.0016 | -0.01205 | 0.0040 | 0.988 | 0.980 | 0.995 | 0.0031 |
| AC106864.1 | 0.0006 | -0.05703 | 0.0216 | 0.944 | 0.905 | 0.985 | 0.0083 |
| AC011462.4 | 0.0124 | -0.01219 | 0.0040 | 0.987 | 0.979 | 0.995 | 0.0028 |
| APTR       | 0.0263 | -0.00121 | 0.0004 | 0.998 | 0.997 | 0.999 | 0.0133 |
| AC099778.1 | 0.0172 | -0.0062  | 0.0024 | 0.993 | 0.988 | 0.998 | 0.0126 |
| AL121944.1 | 0.0031 | -0.00584 | 0.0019 | 0.994 | 0.990 | 0.997 | 0.0026 |

---

---

|              |        |          |        |       |       |       |        |
|--------------|--------|----------|--------|-------|-------|-------|--------|
| AC010761.4   | 0.0066 | -0.01595 | 0.0062 | 0.984 | 0.972 | 0.996 | 0.0104 |
| AL031186.1   | 0.0033 | -0.01224 | 0.0052 | 0.987 | 0.977 | 0.998 | 0.0204 |
| AL513320.1   | 0.0062 | -0.01521 | 0.0049 | 0.984 | 0.975 | 0.994 | 0.0022 |
| AC120053.1   | 1.42E- | -0.00667 | 0.0015 | 0.993 | 0.990 | 0.996 | 2.92E- |
| AC098484.2   | 0.0003 | -0.03399 | 0.0117 | 0.966 | 0.944 | 0.989 | 0.0037 |
| MAPKAPK5-AS1 | 0.0048 | -0.0007  | 0.0002 | 0.999 | 0.998 | 0.999 | 0.0004 |
| AC009061.2   | 0.0497 | -0.00497 | 0.0022 | 0.995 | 0.990 | 0.999 | 0.0248 |
| EAF1-AS1     | 0.0032 | -0.03533 | 0.0129 | 0.965 | 0.941 | 0.990 | 0.0062 |
| AC107884.1   | 0.0079 | -0.00371 | 0.0015 | 0.996 | 0.993 | 0.999 | 0.0185 |
| AL451050.2   | 0.0008 | -0.00989 | 0.0039 | 0.990 | 0.982 | 0.997 | 0.0125 |
| AC007406.5   | 0.0328 | -0.00118 | 0.0004 | 0.998 | 0.997 | 0.999 | 0.0150 |

---

---

|            |        |          |        |       |       |       |        |
|------------|--------|----------|--------|-------|-------|-------|--------|
| AC010973.2 | 0.0021 | -0.00752 | 0.0025 | 0.992 | 0.987 | 0.997 | 0.0029 |
| AC005726.3 | 0.0003 | -0.00753 | 0.0024 | 0.992 | 0.987 | 0.997 | 0.0018 |
| AC095057.3 | 0.0001 | -0.00499 | 0.0021 | 0.995 | 0.990 | 0.999 | 0.0232 |
| DICER1-AS1 | 0.0299 | -0.00121 | 0.0005 | 0.998 | 0.997 | 0.999 | 0.0366 |
| LINC01578  | 0.0013 | -0.00023 | 8.51E- | 0.999 | 0.999 | 0.999 | 0.0073 |
| POC1B-AS1  | 0.0027 | -0.00488 | 0.0016 | 0.995 | 0.991 | 0.998 | 0.0038 |
| AC132872.3 | 0.0004 | -0.0107  | 0.0030 | 0.989 | 0.983 | 0.995 | 0.0005 |
| AP000873.4 | 0.0011 | -0.02435 | 0.0071 | 0.975 | 0.962 | 0.989 | 0.0006 |
| AC010201.2 | 0.0005 | -0.01013 | 0.0033 | 0.989 | 0.983 | 0.996 | 0.0026 |
| VASH1-AS1  | 0.0263 | -0.00697 | 0.0033 | 0.993 | 0.986 | 0.999 | 0.0348 |
| KRT7-AS    | 0.0005 | -0.00039 | 0.0001 | 0.999 | 0.999 | 0.999 | 0.0005 |

---

---

|            |        |          |        |       |       |       |        |
|------------|--------|----------|--------|-------|-------|-------|--------|
| AC018809.2 | 0.0219 | -0.0041  | 0.0013 | 0.995 | 0.993 | 0.998 | 0.0019 |
| ZNF32-AS1  | 0.0051 | -0.03037 | 0.0088 | 0.970 | 0.953 | 0.987 | 0.0006 |
| LINC00649  | 0.0019 | -0.00048 | 0.0001 | 0.999 | 0.999 | 0.999 | 0.0098 |
| AC022150.2 | 0.0001 | -0.00559 | 0.0017 | 0.994 | 0.990 | 0.997 | 0.0015 |
| AC124016.1 | 0.0004 | -0.01642 | 0.0061 | 0.983 | 0.971 | 0.995 | 0.0076 |
| AC024060.1 | 4.79E- | -0.00615 | 0.0012 | 0.993 | 0.991 | 0.996 | 2.09E- |
| SAMD12-AS1 | 0.0083 | -0.01606 | 0.0049 | 0.984 | 0.974 | 0.993 | 0.0012 |
| AC023908.3 | 0.0043 | -0.00798 | 0.0031 | 0.992 | 0.986 | 0.998 | 0.0106 |
| AL161452.1 | 0.0002 | -0.02518 | 0.0067 | 0.975 | 0.962 | 0.988 | 0.0002 |
| RAB11B-AS1 | 0.0172 | -0.00211 | 0.0008 | 0.997 | 0.996 | 0.999 | 0.0085 |
| BREA2      | 0.0021 | -0.00697 | 0.0024 | 0.993 | 0.988 | 0.997 | 0.0041 |

---

---

|            |        |          |        |       |       |       |        |
|------------|--------|----------|--------|-------|-------|-------|--------|
| LINC00612  | 0.0403 | -0.02907 | 0.0147 | 0.971 | 0.943 | 0.999 | 0.0489 |
| LINC00885  | 0.0445 | -0.00056 | 0.0002 | 0.999 | 0.998 | 0.999 | 0.0311 |
| MANEA-DT   | 0.0286 | -0.01133 | 0.0040 | 0.988 | 0.980 | 0.996 | 0.0053 |
| SEC24B-AS1 | 0.0012 | -0.01549 | 0.0038 | 0.984 | 0.977 | 0.992 | 4.96E- |
| AC006213.4 | 0.0011 | -0.01098 | 0.0045 | 0.989 | 0.980 | 0.997 | 0.0147 |
| AC078883.1 | 0.0054 | -0.00542 | 0.0020 | 0.994 | 0.990 | 0.998 | 0.0073 |
| AC107214.2 | 0.0111 | -0.01748 | 0.0078 | 0.982 | 0.967 | 0.997 | 0.0267 |
| AL031667.3 | 0.0387 | -0.01823 | 0.0065 | 0.981 | 0.969 | 0.994 | 0.0053 |
| AC010503.4 | 0.0021 | -0.0009  | 0.0002 | 0.999 | 0.998 | 0.999 | 0.0002 |
| AC007038.2 | 0.0004 | -0.01068 | 0.0029 | 0.989 | 0.983 | 0.995 | 0.0002 |
| AC009812.1 | 0.0072 | -0.00592 | 0.0018 | 0.994 | 0.990 | 0.997 | 0.0010 |

---

---

|            |        |          |        |       |       |       |        |
|------------|--------|----------|--------|-------|-------|-------|--------|
| AC004466.3 | 0.0063 | -0.02848 | 0.0117 | 0.971 | 0.949 | 0.994 | 0.0149 |
| AL359921.1 | 0.0281 | -0.01866 | 0.0087 | 0.981 | 0.964 | 0.998 | 0.0336 |
| AC004253.1 | 0.0021 | -0.01869 | 0.0061 | 0.981 | 0.969 | 0.993 | 0.0024 |
| AL596202.1 | 0.0239 | -0.00647 | 0.0024 | 0.993 | 0.988 | 0.998 | 0.0087 |
| AC004656.1 | 0.0043 | -0.00034 | 0.0001 | 0.999 | 0.999 | 0.999 | 0.0082 |
| LINC02535  | 0.0315 | -0.01292 | 0.0054 | 0.987 | 0.976 | 0.997 | 0.0181 |
| AL512604.2 | 0.0083 | -0.09268 | 0.0438 | 0.911 | 0.836 | 0.993 | 0.0346 |
| SCAMP1-AS1 | 6.37E- | -0.00274 | 0.0006 | 0.997 | 0.995 | 0.998 | 3.65E- |
| AC093227.1 | 0.0311 | -0.00452 | 0.0014 | 0.995 | 0.992 | 0.998 | 0.0016 |
| AC233728.1 | 0.0230 | -0.04551 | 0.0161 | 0.955 | 0.925 | 0.986 | 0.0049 |
| AC127070.1 | 0.0158 | -0.01276 | 0.0055 | 0.987 | 0.976 | 0.998 | 0.0207 |

---

---

|             |        |          |        |       |       |       |        |
|-------------|--------|----------|--------|-------|-------|-------|--------|
| AC002550.2  | 0.0263 | -0.01427 | 0.0059 | 0.985 | 0.974 | 0.997 | 0.0163 |
| AL355472.4  | 0.0017 | -0.01437 | 0.0060 | 0.985 | 0.974 | 0.997 | 0.0182 |
| AL359921.2  | 0.0082 | -0.008   | 0.0025 | 0.992 | 0.987 | 0.996 | 0.0016 |
| AC104564.3  | 6.29E- | -0.02886 | 0.0079 | 0.971 | 0.956 | 0.986 | 0.0003 |
| AC011468.5  | 0.0005 | -0.01191 | 0.0048 | 0.988 | 0.978 | 0.997 | 0.0145 |
| AL022328.2  | 0.0001 | -0.00737 | 0.0021 | 0.992 | 0.988 | 0.996 | 0.0007 |
| PSMB8-AS1   | 0.0227 | -0.00087 | 0.0002 | 0.999 | 0.998 | 0.999 | 0.0001 |
| SEPSECS-AS1 | 0.0120 | -0.00381 | 0.0015 | 0.996 | 0.993 | 0.999 | 0.0137 |
| AC020911.1  | 0.0056 | -0.06871 | 0.0218 | 0.933 | 0.894 | 0.974 | 0.0016 |
| AC084824.3  | 0.0239 | -0.0237  | 0.0098 | 0.976 | 0.957 | 0.995 | 0.0157 |
| AL139289.1  | 0.0091 | -0.01199 | 0.0042 | 0.988 | 0.979 | 0.996 | 0.0051 |

---

---

|            |        |          |        |       |       |       |        |
|------------|--------|----------|--------|-------|-------|-------|--------|
| OGFR-AS1   | 0.0006 | -0.04856 | 0.0141 | 0.952 | 0.926 | 0.979 | 0.0005 |
| LINC01126  | 0.0455 | -0.019   | 0.0074 | 0.981 | 0.966 | 0.995 | 0.0107 |
| AC093726.2 | 0.0004 | -0.02139 | 0.0059 | 0.978 | 0.967 | 0.990 | 0.0003 |
| LINC00892  | 0.0029 | -0.01637 | 0.0073 | 0.983 | 0.969 | 0.997 | 0.0253 |
| AC002128.1 | 0.0027 | -0.01141 | 0.0034 | 0.988 | 0.981 | 0.995 | 0.0011 |
| AC024075.2 | 0.0099 | -0.00185 | 0.0006 | 0.998 | 0.996 | 0.999 | 0.0030 |
| INTS6-AS1  | 0.0099 | -0.00277 | 0.0012 | 0.997 | 0.994 | 0.999 | 0.0318 |
| AC090589.3 | 0.0096 | -0.00845 | 0.0036 | 0.991 | 0.984 | 0.998 | 0.0209 |
| AL031714.1 | 0.0007 | -0.00172 | 0.0006 | 0.998 | 0.997 | 0.999 | 0.0052 |
| AC025165.5 | 0.0011 | -0.00652 | 0.0028 | 0.993 | 0.987 | 0.999 | 0.0243 |
| AL357033.4 | 0.0148 | -0.00247 | 0.0009 | 0.997 | 0.995 | 0.999 | 0.0112 |

---



---

|             |        |          |        |       |       |       |        |
|-------------|--------|----------|--------|-------|-------|-------|--------|
| AC009065.8  | 3.10E- | -0.01036 | 0.0028 | 0.989 | 0.984 | 0.995 | 0.0002 |
| AC027601.1  | 0.0127 | -0.00375 | 0.0015 | 0.996 | 0.993 | 0.999 | 0.0187 |
| AC079684.1  | 0.0021 | -0.01156 | 0.0051 | 0.988 | 0.978 | 0.998 | 0.0238 |
| AC008764.6  | 0.0010 | -0.00596 | 0.0021 | 0.994 | 0.989 | 0.998 | 0.0057 |
| SRRM2-AS1   | 0.0477 | -0.00419 | 0.0020 | 0.995 | 0.991 | 0.999 | 0.0441 |
| ZFHX2-AS1   | 0.0120 | -0.00672 | 0.0021 | 0.993 | 0.989 | 0.997 | 0.0021 |
| AC105020.6  | 0.0194 | -0.02616 | 0.0102 | 0.974 | 0.954 | 0.993 | 0.0107 |
| LINC00893   | 0.0039 | -0.00288 | 0.0010 | 0.997 | 0.995 | 0.999 | 0.0056 |
| AC009133.1  | 0.0009 | -0.00129 | 0.0005 | 0.998 | 0.997 | 0.999 | 0.0109 |
| AC063948.1  | 0.0002 | -0.02263 | 0.0073 | 0.977 | 0.963 | 0.991 | 0.0020 |
| SLC25A5-AS1 | 0.0116 | -0.0057  | 0.0023 | 0.994 | 0.989 | 0.998 | 0.0144 |

---

---

|            |        |          |        |       |       |       |        |
|------------|--------|----------|--------|-------|-------|-------|--------|
| POLR2J4    | 0.0026 | -0.00356 | 0.0010 | 0.996 | 0.994 | 0.998 | 0.0009 |
| AF117829.1 | 0.0427 | -0.00127 | 0.0004 | 0.998 | 0.997 | 0.999 | 0.0050 |
| TMEM51-AS1 | 0.0199 | -0.00088 | 0.0002 | 0.999 | 0.998 | 0.999 | 0.0004 |
| LINC01871  | 0.0034 | -0.00581 | 0.0019 | 0.994 | 0.990 | 0.998 | 0.0036 |
| ZNF529-AS1 | 0.0263 | -0.00228 | 0.0008 | 0.997 | 0.996 | 0.999 | 0.0051 |
| AC092119.2 | 0.0010 | -0.0068  | 0.0026 | 0.993 | 0.988 | 0.998 | 0.0105 |
| LINC02598  | 0.0264 | -0.00971 | 0.0036 | 0.990 | 0.983 | 0.997 | 0.0076 |
| AC018809.1 | 0.0007 | -0.02057 | 0.0060 | 0.979 | 0.968 | 0.991 | 0.0007 |
| AC124045.1 | 0.0205 | -0.00283 | 0.0011 | 0.997 | 0.995 | 0.999 | 0.0102 |
| TRG-AS1    | 0.0031 | -0.00455 | 0.0016 | 0.995 | 0.992 | 0.998 | 0.0060 |
| AC097376.2 | 0.0090 | -0.00156 | 0.0007 | 0.998 | 0.997 | 0.999 | 0.0309 |

---

---

|            |        |          |        |       |       |       |        |
|------------|--------|----------|--------|-------|-------|-------|--------|
| C1RL-AS1   | 0.0090 | -0.00172 | 0.0005 | 0.998 | 0.997 | 0.999 | 0.0021 |
| AL355488.1 | 7.59E- | -0.00118 | 0.0004 | 0.998 | 0.997 | 0.999 | 0.0048 |
| AL353622.1 | 0.0099 | -0.00415 | 0.0011 | 0.995 | 0.993 | 0.998 | 0.0003 |
| AC080112.1 | 0.0206 | -0.00043 | 0.0001 | 0.999 | 0.999 | 0.999 | 0.0018 |
| AC020931.1 | 0.0051 | -0.04889 | 0.0143 | 0.952 | 0.925 | 0.979 | 0.0006 |
| AC090425.2 | 0.0016 | -0.03904 | 0.0122 | 0.961 | 0.938 | 0.984 | 0.0013 |
| AL139123.1 | 0.0096 | -0.02987 | 0.0103 | 0.970 | 0.951 | 0.990 | 0.0037 |
| LINC00539  | 0.0008 | -0.01584 | 0.0061 | 0.984 | 0.972 | 0.996 | 0.0103 |
| AL121992.3 | 0.0120 | -0.04925 | 0.0229 | 0.951 | 0.910 | 0.995 | 0.0316 |
| AC010271.1 | 0.0369 | -0.02202 | 0.0097 | 0.978 | 0.959 | 0.997 | 0.0245 |
| AC011773.4 | 0.0036 | -0.05116 | 0.0177 | 0.950 | 0.917 | 0.983 | 0.0039 |

---

---

|              |        |          |        |       |       |       |        |
|--------------|--------|----------|--------|-------|-------|-------|--------|
| TMEM161B-AS1 | 0.0058 | -0.00186 | 0.0006 | 0.998 | 0.996 | 0.999 | 0.0022 |
| AC003070.1   | 0.0006 | -0.00284 | 0.0013 | 0.997 | 0.994 | 0.999 | 0.0305 |
| AC022916.1   | 0.0190 | -0.00386 | 0.0014 | 0.996 | 0.993 | 0.998 | 0.0059 |
| AC040977.1   | 0.0313 | -0.00636 | 0.0031 | 0.993 | 0.987 | 0.999 | 0.0417 |
| MORF4L2-AS1  | 0.0042 | -0.00974 | 0.0049 | 0.990 | 0.980 | 0.999 | 0.0499 |
| AL021368.2   | 0.0025 | -0.00792 | 0.003  | 0.992 | 0.986 | 0.997 | 0.0082 |
| AC010538.1   | 0.0078 | -0.03992 | 0.0187 | 0.960 | 0.926 | 0.996 | 0.0330 |
| OSGEPL1-AS1  | 0.0119 | -0.03271 | 0.0099 | 0.967 | 0.949 | 0.986 | 0.0010 |
| LENG8-AS1    | 7.28E- | -0.00384 | 0.0011 | 0.996 | 0.993 | 0.998 | 0.0007 |
| AC008764.8   | 0.0153 | -0.01027 | 0.0033 | 0.989 | 0.983 | 0.996 | 0.0018 |
| AL732314.6   | 0.0138 | -0.03845 | 0.0156 | 0.962 | 0.933 | 0.992 | 0.0140 |

---

---

|                         |        |          |        |       |       |       |        |
|-------------------------|--------|----------|--------|-------|-------|-------|--------|
| AC026765.2              | 0.0109 | -0.00567 | 0.0025 | 0.994 | 0.989 | 0.999 | 0.0263 |
| AC012615.1              | 0.0002 | -0.00313 | 0.0009 | 0.996 | 0.994 | 0.998 | 0.0013 |
| LINC02453               | 0.0326 | -0.01143 | 0.0049 | 0.988 | 0.979 | 0.998 | 0.0212 |
| AC011481.2              | 5.32E- | -0.05219 | 0.0187 | 0.949 | 0.914 | 0.984 | 0.0053 |
| AC021078.1              | 0.0371 | -0.00039 | 0.0001 | 0.999 | 0.999 | 0.999 | 0.0055 |
| AC073575.2              | 0.0032 | -0.02595 | 0.0076 | 0.974 | 0.959 | 0.989 | 0.0007 |
| AC093726.1              | 0.0215 | -0.00543 | 0.0015 | 0.994 | 0.991 | 0.997 | 0.0004 |
| AC009107.2              | 0.0005 | -0.03333 | 0.0119 | 0.967 | 0.944 | 0.990 | 0.0052 |
| PDXDC2P-<br>NPIP14<br>P | 0.0052 | -0.00092 | 0.0003 | 0.999 | 0.998 | 0.999 | 0.0037 |
| AC018653.3              | 0.0033 | -0.00496 | 0.0016 | 0.995 | 0.991 | 0.998 | 0.0028 |
| AC006213.1              | 0.0411 | -0.01453 | 0.0068 | 0.985 | 0.972 | 0.998 | 0.0345 |

---

---

|             |        |          |        |       |       |       |        |
|-------------|--------|----------|--------|-------|-------|-------|--------|
| AL606760.2  | 0.0012 | -0.02773 | 0.0094 | 0.972 | 0.954 | 0.990 | 0.0034 |
| AC008687.3  | 0.0268 | -0.01066 | 0.0045 | 0.989 | 0.980 | 0.998 | 0.0197 |
| SPAG5-AS1   | 0.0005 | -0.00675 | 0.0019 | 0.993 | 0.989 | 0.997 | 0.0006 |
| AC025165.4  | 6.42E- | -0.02884 | 0.0107 | 0.971 | 0.951 | 0.992 | 0.0071 |
| AL162258.2  | 1.92E- | -0.01499 | 0.0038 | 0.985 | 0.977 | 0.992 | 8.60E- |
| AC093297.2  | 0.0040 | -0.00133 | 0.0004 | 0.998 | 0.997 | 0.999 | 0.0013 |
| IPO5P1      | 0.0004 | -0.00064 | 0.0001 | 0.999 | 0.999 | 0.999 | 0.0004 |
| PCBP1-AS1   | 0.0001 | -0.00101 | 0.0003 | 0.998 | 0.998 | 0.999 | 0.0011 |
| TMSB15B-AS1 | 0.0067 | -0.0235  | 0.0081 | 0.976 | 0.961 | 0.992 | 0.0039 |
| AL021707.3  | 0.0009 | -0.01465 | 0.0049 | 0.985 | 0.975 | 0.995 | 0.0031 |
| AL590428.1  | 0.0034 | 0.021443 | 0.0067 | 1.021 | 1.008 | 1.035 | 0.0014 |

---

---

|             |        |          |        |       |       |       |        |
|-------------|--------|----------|--------|-------|-------|-------|--------|
| AC008735.4  | 0.0201 | -0.0184  | 0.0063 | 0.981 | 0.969 | 0.994 | 0.0040 |
| AC017083.1  | 0.0137 | -0.01388 | 0.0049 | 0.986 | 0.976 | 0.995 | 0.0051 |
| AC012146.3  | 0.0356 | -0.05149 | 0.0261 | 0.949 | 0.902 | 0.999 | 0.0485 |
| AL928654.2  | 0.0081 | -0.00362 | 0.0016 | 0.996 | 0.993 | 0.999 | 0.0287 |
| AC020558.2  | 0.0415 | -0.00885 | 0.0038 | 0.991 | 0.983 | 0.998 | 0.0204 |
| AL133243.3  | 0.0152 | -0.00742 | 0.003  | 0.992 | 0.986 | 0.998 | 0.0134 |
| ZNF252P-AS1 | 0.0051 | -0.0123  | 0.0042 | 0.987 | 0.979 | 0.996 | 0.0036 |
| AP002748.3  | 0.0056 | -0.00158 | 0.0006 | 0.998 | 0.997 | 0.999 | 0.0200 |
| GARS-DT     | 0.0432 | -0.00051 | 0.0001 | 0.999 | 0.999 | 0.999 | 0.0039 |
| AL392172.1  | 0.0427 | -0.00176 | 0.0007 | 0.998 | 0.996 | 0.999 | 0.0162 |
| AC124016.2  | 0.0019 | -0.00763 | 0.0028 | 0.992 | 0.986 | 0.998 | 0.0080 |

---

---

|            |        |          |        |       |       |       |        |
|------------|--------|----------|--------|-------|-------|-------|--------|
| AC023509.1 | 0.0050 | -0.03886 | 0.0128 | 0.961 | 0.938 | 0.986 | 0.0024 |
| PAXIP1-AS1 | 0.0106 | -0.00074 | 0.0002 | 0.999 | 0.998 | 0.999 | 0.0037 |
| AC092953.2 | 0.0213 | -0.00622 | 0.0030 | 0.993 | 0.987 | 0.999 | 0.0391 |
| LINC01934  | 0.0233 | -0.02307 | 0.0096 | 0.977 | 0.958 | 0.995 | 0.0170 |
| AC005332.3 | 0.0022 | -0.00436 | 0.0014 | 0.995 | 0.992 | 0.998 | 0.0031 |
| LINC00996  | 0.0364 | -0.0077  | 0.0031 | 0.992 | 0.986 | 0.998 | 0.0132 |
| AC109347.2 | 0.0143 | -0.02539 | 0.0083 | 0.974 | 0.959 | 0.990 | 0.0022 |
| AC016027.1 | 0.0002 | -0.00825 | 0.0025 | 0.991 | 0.986 | 0.996 | 0.0014 |
| AC006378.1 | 0.0029 | -0.01863 | 0.0087 | 0.981 | 0.964 | 0.998 | 0.0324 |
| AC020910.4 | 0.0001 | -0.00752 | 0.0022 | 0.992 | 0.988 | 0.996 | 0.0009 |
| AC008079.1 | 0.0001 | -0.0066  | 0.0031 | 0.993 | 0.987 | 0.999 | 0.0373 |

---



---

|            |        |          |        |       |       |       |        |
|------------|--------|----------|--------|-------|-------|-------|--------|
| AC009902.3 | 0.0063 | -0.01249 | 0.0051 | 0.987 | 0.977 | 0.997 | 0.0147 |
| AC004908.1 | 0.0199 | -0.01538 | 0.0073 | 0.984 | 0.970 | 0.998 | 0.0353 |
| AC040934.1 | 0.0171 | -0.04498 | 0.0217 | 0.956 | 0.916 | 0.997 | 0.0387 |
| PTOV1-AS2  | 4.37E- | -0.00321 | 0.0007 | 0.996 | 0.995 | 0.998 | 4.33E- |
| AP005482.3 | 0.0206 | -0.00505 | 0.0024 | 0.994 | 0.990 | 0.999 | 0.0400 |
| ZNF674-AS1 | 0.0025 | -0.00231 | 0.0008 | 0.997 | 0.995 | 0.999 | 0.0095 |
| LINC01534  | 0.0256 | -0.00474 | 0.0022 | 0.995 | 0.990 | 0.999 | 0.0348 |
| DM1-AS     | 0.0048 | -0.00757 | 0.0030 | 0.992 | 0.986 | 0.998 | 0.0134 |
| AC005519.1 | 0.0071 | -0.0109  | 0.0039 | 0.989 | 0.981 | 0.996 | 0.0055 |
| AL355297.4 | 0.0222 | -0.02399 | 0.0114 | 0.976 | 0.954 | 0.998 | 0.0357 |
| AC020915.2 | 0.0001 | -0.01503 | 0.0066 | 0.985 | 0.972 | 0.997 | 0.0229 |

---

---

|            |        |          |        |       |       |       |        |
|------------|--------|----------|--------|-------|-------|-------|--------|
| AL353622.2 | 0.0296 | -0.07732 | 0.0310 | 0.925 | 0.870 | 0.983 | 0.0127 |
| AC099811.3 | 0.0091 | -0.05504 | 0.0213 | 0.946 | 0.907 | 0.986 | 0.0100 |
| AL603832.1 | 0.0178 | -0.02941 | 0.0118 | 0.971 | 0.948 | 0.993 | 0.0132 |
| LINC00852  | 0.0007 | -0.00658 | 0.0028 | 0.993 | 0.987 | 0.998 | 0.0201 |
| AC009088.1 | 0.0156 | -0.03233 | 0.0164 | 0.968 | 0.937 | 0.999 | 0.0487 |
| AL109811.3 | 3.18E- | -0.00272 | 0.0011 | 0.997 | 0.995 | 0.999 | 0.0158 |
| AF129075.1 | 6.99E- | -0.02418 | 0.0080 | 0.976 | 0.960 | 0.991 | 0.0026 |
| AC010319.4 | 0.0018 | -0.02626 | 0.0080 | 0.974 | 0.958 | 0.989 | 0.0011 |
| AP000347.2 | 0.0010 | -0.01519 | 0.0037 | 0.984 | 0.977 | 0.992 | 6.35E- |
| AL109811.2 | 0.0345 | -0.00961 | 0.0042 | 0.990 | 0.982 | 0.998 | 0.0229 |
| AC004076.2 | 2.24E- | -0.01115 | 0.0030 | 0.988 | 0.982 | 0.994 | 0.0003 |

---

---

|                                |        |          |        |       |       |       |        |
|--------------------------------|--------|----------|--------|-------|-------|-------|--------|
| SNHG12                         | 0.0101 | -0.0004  | 0.0001 | 0.999 | 0.999 | 0.999 | 0.0029 |
| SH3BP5-AS1                     | 8.71E- | -0.00075 | 0.0002 | 0.999 | 0.998 | 0.999 | 0.0050 |
| ZKSCAN2-DT                     | 9.96E- | -0.00349 | 0.0010 | 0.996 | 0.994 | 0.998 | 0.0006 |
| AC008760.1                     | 0.0003 | -0.0084  | 0.0026 | 0.991 | 0.986 | 0.996 | 0.0015 |
| MIR34AHG                       | 0.0329 | -0.03374 | 0.0136 | 0.966 | 0.941 | 0.993 | 0.0137 |
| AC073335.2                     | 0.0161 | -0.00079 | 0.0002 | 0.999 | 0.998 | 0.999 | 0.0003 |
| AC079148.1                     | 0.0002 | -0.02791 | 0.0080 | 0.972 | 0.957 | 0.987 | 0.0005 |
| SNHG10                         | 0.0080 | -0.00139 | 0.0004 | 0.998 | 0.997 | 0.999 | 0.0052 |
| STAG3L5P-<br>PVRIG2P<br>-PILRB | 6.49E- | -0.00447 | 0.0009 | 0.995 | 0.993 | 0.997 | 2.94E- |
| LNCTAM34A                      | 0.0424 | -0.00192 | 0.0008 | 0.998 | 0.996 | 0.999 | 0.0302 |
| CACTIN-AS1                     | 0.0053 | -0.02662 | 0.0089 | 0.973 | 0.956 | 0.991 | 0.0029 |

---

---

|             |        |          |        |       |       |       |        |
|-------------|--------|----------|--------|-------|-------|-------|--------|
| OCIAD1-AS1  | 2.92E- | -0.04539 | 0.0117 | 0.955 | 0.933 | 0.977 | 0.0001 |
| AC006435.2  | 0.0076 | -0.00416 | 0.0016 | 0.995 | 0.992 | 0.998 | 0.0095 |
| AC012615.6  | 4.53E- | -0.00551 | 0.0018 | 0.994 | 0.990 | 0.998 | 0.0024 |
| TMEM147-AS1 | 0.0030 | -0.00068 | 0.0002 | 0.999 | 0.998 | 0.999 | 0.0024 |
| AC127502.2  | 0.0408 | -0.00178 | 0.0007 | 0.998 | 0.996 | 0.999 | 0.0109 |
| AC026741.1  | 0.0052 | -0.09012 | 0.0360 | 0.913 | 0.851 | 0.980 | 0.0123 |
| AC006547.1  | 0.0096 | -0.00307 | 0.0013 | 0.996 | 0.994 | 0.999 | 0.0187 |
| AC090425.1  | 0.0027 | -0.04403 | 0.0163 | 0.956 | 0.926 | 0.988 | 0.0069 |
| AL033384.2  | 0.0027 | -0.01894 | 0.0055 | 0.981 | 0.970 | 0.992 | 0.0006 |
| AL135999.2  | 0.0199 | -0.06206 | 0.0307 | 0.939 | 0.884 | 0.998 | 0.0433 |
| AL136295.7  | 0.0008 | -0.00257 | 0.0012 | 0.997 | 0.995 | 0.999 | 0.0390 |

---

---

|             |        |          |        |       |       |       |        |
|-------------|--------|----------|--------|-------|-------|-------|--------|
| AC084018.1  | 6.74E- | -0.00308 | 0.0013 | 0.996 | 0.994 | 0.999 | 0.0271 |
| AL022311.1  | 0.0159 | -0.00416 | 0.0011 | 0.995 | 0.993 | 0.998 | 0.0004 |
| AC026979.3  | 0.0015 | -0.0397  | 0.0118 | 0.961 | 0.939 | 0.983 | 0.0007 |
| AL133520.1  | 0.0134 | -0.00538 | 0.0024 | 0.994 | 0.989 | 0.999 | 0.0277 |
| AC023632.2  | 2.22E- | -0.0155  | 0.0067 | 0.984 | 0.971 | 0.997 | 0.0209 |
| MALINC1     | 0.0324 | -0.0034  | 0.0015 | 0.996 | 0.993 | 0.999 | 0.0302 |
| AC127024.5  | 0.0319 | -0.00665 | 0.0031 | 0.993 | 0.987 | 0.999 | 0.0319 |
| PPP1R26-AS1 | 0.0097 | -0.00375 | 0.0011 | 0.996 | 0.994 | 0.998 | 0.0010 |
| AL008729.1  | 0.0206 | -0.01032 | 0.0031 | 0.989 | 0.983 | 0.995 | 0.0011 |
| AL035563.1  | 0.0028 | -0.00588 | 0.0021 | 0.994 | 0.990 | 0.998 | 0.0053 |
| AP001412.1  | 0.0157 | -0.03164 | 0.0099 | 0.968 | 0.950 | 0.987 | 0.0014 |

---

---

|            |        |          |        |       |       |       |        |
|------------|--------|----------|--------|-------|-------|-------|--------|
| AC008105.1 | 0.0121 | -0.00328 | 0.0013 | 0.996 | 0.994 | 0.999 | 0.0165 |
| AC006504.8 | 0.0043 | -0.00624 | 0.0028 | 0.993 | 0.988 | 0.999 | 0.0301 |
| SNHG18     | 0.0193 | -0.00012 | 4.65E- | 0.999 | 0.999 | 0.999 | 0.0084 |
| AC087276.2 | 0.0014 | -0.03705 | 0.0179 | 0.963 | 0.930 | 0.998 | 0.0392 |
| AC007066.2 | 0.0004 | -0.00711 | 0.0021 | 0.992 | 0.988 | 0.997 | 0.0008 |
| AC125257.1 | 0.0042 | -0.00058 | 0.0002 | 0.999 | 0.998 | 0.999 | 0.0093 |
| AL117336.3 | 0.0162 | -0.00478 | 0.0021 | 0.995 | 0.991 | 0.999 | 0.0244 |
| AC008494.3 | 0.0284 | -0.02953 | 0.0127 | 0.970 | 0.947 | 0.995 | 0.0202 |
| NFYC-AS1   | 0.0203 | -0.00416 | 0.0020 | 0.995 | 0.991 | 0.999 | 0.0380 |
| FAM13A-AS1 | 0.0001 | -0.00269 | 0.0010 | 0.997 | 0.995 | 0.999 | 0.0084 |
| CD27-AS1   | 0.0186 | -0.00053 | 0.0001 | 0.999 | 0.999 | 0.999 | 0.0021 |

---

---

|            |        |          |        |       |       |       |        |
|------------|--------|----------|--------|-------|-------|-------|--------|
| AC012170.2 | 0.0014 | -0.01323 | 0.0056 | 0.986 | 0.975 | 0.997 | 0.0196 |
| AC005387.2 | 0.0203 | -0.04566 | 0.0133 | 0.955 | 0.930 | 0.980 | 0.0006 |
| AP001347.1 | 0.0275 | -0.00706 | 0.0027 | 0.992 | 0.987 | 0.998 | 0.0109 |
| AC012617.1 | 0.0009 | -0.01484 | 0.0053 | 0.985 | 0.975 | 0.995 | 0.0055 |
| AC104986.2 | 0.0009 | -0.00523 | 0.0022 | 0.994 | 0.990 | 0.999 | 0.0199 |
| LINC01004  | 0.0005 | -0.00407 | 0.0012 | 0.995 | 0.993 | 0.998 | 0.0009 |
| AL353708.3 | 0.0076 | -0.01173 | 0.0044 | 0.988 | 0.979 | 0.996 | 0.0076 |
| AL513477.2 | 0.0002 | -0.02469 | 0.0066 | 0.975 | 0.962 | 0.988 | 0.0002 |
| AC011466.3 | 0.0132 | -0.03673 | 0.0161 | 0.963 | 0.933 | 0.994 | 0.0231 |
| AC135050.6 | 0.0159 | -0.00092 | 0.0004 | 0.999 | 0.998 | 0.999 | 0.0337 |
| AC011978.2 | 0.0022 | -0.01031 | 0.0038 | 0.989 | 0.982 | 0.997 | 0.0067 |

---

---

|            |        |          |        |       |       |       |        |
|------------|--------|----------|--------|-------|-------|-------|--------|
| PSMA3-AS1  | 6.42E- | -0.00044 | 0.0001 | 0.999 | 0.999 | 0.999 | 0.0001 |
| ADNP-AS1   | 0.0132 | -0.00429 | 0.0019 | 0.995 | 0.991 | 0.999 | 0.0309 |
| AL683813.1 | 0.0099 | -0.00343 | 0.0013 | 0.996 | 0.993 | 0.999 | 0.0116 |
| AC018926.2 | 0.0001 | -0.03092 | 0.0082 | 0.969 | 0.953 | 0.985 | 0.0001 |
| TNRC6C-AS1 | 0.0374 | -0.00052 | 0.0002 | 0.999 | 0.999 | 0.999 | 0.0095 |
| AC108471.2 | 0.0254 | -0.01677 | 0.0056 | 0.983 | 0.972 | 0.994 | 0.0032 |
| AL157392.3 | 0.0327 | -0.00068 | 0.0002 | 0.999 | 0.998 | 0.999 | 0.0121 |
| AC010491.1 | 0.0020 | -0.01174 | 0.0034 | 0.988 | 0.981 | 0.994 | 0.0005 |
| OSER1-DT   | 0.0047 | -0.00051 | 0.0002 | 0.999 | 0.999 | 0.999 | 0.0173 |
| AL662797.1 | 0.0068 | -0.0239  | 0.0075 | 0.976 | 0.962 | 0.990 | 0.0014 |
| AD000671.3 | 0.0007 | -0.09984 | 0.0244 | 0.904 | 0.862 | 0.949 | 4.29E- |

---



---

|             |        |          |        |       |       |       |        |
|-------------|--------|----------|--------|-------|-------|-------|--------|
| Z69733.1    | 0.0222 | -0.02342 | 0.0105 | 0.976 | 0.956 | 0.997 | 0.0257 |
| CAPN10-DT   | 0.0155 | -0.00399 | 0.0013 | 0.996 | 0.993 | 0.998 | 0.0031 |
| THUMPD3-AS1 | 1.15E- | -0.00052 | 0.0001 | 0.999 | 0.999 | 0.999 | 0.0018 |
| SEMA3F-AS1  | 0.0004 | -0.00492 | 0.0017 | 0.995 | 0.991 | 0.998 | 0.0057 |
| AC132192.2  | 0.0001 | -0.00456 | 0.0019 | 0.995 | 0.991 | 0.999 | 0.0205 |
| AC090260.1  | 0.0339 | -0.03642 | 0.0182 | 0.964 | 0.930 | 0.999 | 0.0461 |
| AC034236.2  | 0.0002 | -0.00883 | 0.0021 | 0.991 | 0.987 | 0.995 | 3.54E- |
| AC026803.2  | 7.55E- | -0.02224 | 0.0071 | 0.978 | 0.964 | 0.991 | 0.0019 |
| AC116913.1  | 0.0036 | -0.00936 | 0.0031 | 0.990 | 0.984 | 0.996 | 0.0033 |
| AC026362.1  | 0.0068 | -0.01679 | 0.0043 | 0.983 | 0.974 | 0.991 | 0.0001 |
| GEMIN7-AS1  | 0.0023 | -0.01135 | 0.0038 | 0.988 | 0.981 | 0.996 | 0.0028 |

---

---

|             |        |          |        |       |       |       |        |
|-------------|--------|----------|--------|-------|-------|-------|--------|
| MAP3K14-AS1 | 0.0272 | -0.00205 | 0.0007 | 0.997 | 0.996 | 0.999 | 0.0051 |
| AL731569.1  | 0.0003 | -0.00736 | 0.0024 | 0.992 | 0.987 | 0.997 | 0.0030 |
| LINC00867   | 0.0091 | 0.004646 | 0.0022 | 1.004 | 1.000 | 1.009 | 0.0354 |
| LINC00865   | 0.0197 | -0.00082 | 0.0003 | 0.999 | 0.998 | 0.999 | 0.0124 |
| PAN3-AS1    | 0.0069 | -0.0066  | 0.0025 | 0.993 | 0.988 | 0.998 | 0.0100 |
| RUSC1-AS1   | 0.0053 | -0.00105 | 0.0004 | 0.998 | 0.998 | 0.999 | 0.0092 |
| AC116914.2  | 9.37E- | -0.03483 | 0.0077 | 0.965 | 0.951 | 0.980 | 6.66E- |
| AL645940.1  | 0.0005 | -0.01521 | 0.0062 | 0.984 | 0.973 | 0.996 | 0.0141 |
| LINC00115   | 0.0073 | -0.00989 | 0.0029 | 0.990 | 0.984 | 0.995 | 0.0008 |
| ERVE-1      | 0.0027 | -0.00049 | 0.0002 | 0.999 | 0.999 | 0.999 | 0.0313 |
| AC106052.1  | 7.34E- | -0.09118 | 0.0266 | 0.912 | 0.866 | 0.961 | 0.0006 |

---

---

|                                   |        |          |        |       |       |       |        |
|-----------------------------------|--------|----------|--------|-------|-------|-------|--------|
| ARHGAP27P1-<br>BPTFP1-<br>KPNA2P3 | 0.0160 | -0.00101 | 0.0003 | 0.998 | 0.998 | 0.999 | 0.0041 |
| AC084824.4                        | 0.0075 | -0.00925 | 0.0030 | 0.990 | 0.984 | 0.996 | 0.0020 |
| AC021851.1                        | 0.0101 | -0.02021 | 0.0063 | 0.979 | 0.967 | 0.992 | 0.0014 |
| AC005332.5                        | 0.0287 | -0.00148 | 0.0005 | 0.998 | 0.997 | 0.999 | 0.0072 |
| AC137767.1                        | 0.0277 | -0.00441 | 0.0015 | 0.995 | 0.992 | 0.998 | 0.0044 |
| EHMT2-AS1                         | 0.0003 | -0.08645 | 0.0236 | 0.917 | 0.875 | 0.960 | 0.0002 |
| SLC25A25-AS1                      | 5.87E- | -0.00093 | 0.0002 | 0.999 | 0.998 | 0.999 | 0.0005 |
| AL358472.3                        | 0.0367 | -0.01613 | 0.0055 | 0.984 | 0.973 | 0.994 | 0.0034 |
| MIR762HG                          | 0.0032 | -0.00468 | 0.0017 | 0.995 | 0.992 | 0.998 | 0.0060 |
| AC004148.2                        | 0.0001 | -0.00263 | 0.0006 | 0.997 | 0.996 | 0.998 | 8.57E- |
| AC093495.1                        | 0.0008 | -0.00499 | 0.0015 | 0.995 | 0.991 | 0.998 | 0.0014 |

---

---

|            |        |          |        |       |       |       |        |
|------------|--------|----------|--------|-------|-------|-------|--------|
| LINC01569  | 0.0037 | -0.00189 | 0.0009 | 0.998 | 0.996 | 0.999 | 0.0425 |
| AC099518.4 | 6.22E- | -0.04279 | 0.0112 | 0.958 | 0.937 | 0.979 | 0.0001 |
| AL022322.1 | 0.0005 | -0.00329 | 0.001  | 0.996 | 0.994 | 0.998 | 0.0010 |
| RNF139-AS1 | 7.83E- | -0.00424 | 0.0012 | 0.995 | 0.993 | 0.998 | 0.0005 |
| AC090198.1 | 0.0003 | -0.00448 | 0.0014 | 0.995 | 0.992 | 0.998 | 0.0018 |
| AC008403.3 | 0.0009 | -0.02751 | 0.0113 | 0.972 | 0.951 | 0.994 | 0.0156 |
| AC006942.1 | 0.0012 | -0.0156  | 0.0059 | 0.984 | 0.973 | 0.996 | 0.0087 |
| AC006042.1 | 0.0240 | -0.00303 | 0.0013 | 0.996 | 0.994 | 0.999 | 0.0234 |
| AC084782.3 | 3.43E- | -0.05352 | 0.0183 | 0.947 | 0.914 | 0.982 | 0.0034 |
| AC010326.3 | 0.0058 | -0.00299 | 0.0007 | 0.997 | 0.995 | 0.998 | 0.0001 |
| AC007390.2 | 0.0002 | -0.00762 | 0.0027 | 0.992 | 0.987 | 0.997 | 0.0056 |

---

---

|            |        |          |        |       |       |       |        |
|------------|--------|----------|--------|-------|-------|-------|--------|
| CR559946.2 | 0.0480 | -0.03694 | 0.0179 | 0.963 | 0.930 | 0.998 | 0.0399 |
| AC087289.2 | 0.0012 | -0.0141  | 0.0044 | 0.985 | 0.977 | 0.994 | 0.0015 |
| EXTL3-AS1  | 0.0468 | -0.00587 | 0.0026 | 0.994 | 0.988 | 0.999 | 0.0292 |
| AP000704.1 | 0.0097 | -0.02691 | 0.0105 | 0.973 | 0.953 | 0.993 | 0.0108 |
| AC010327.5 | 0.0414 | -0.0044  | 0.0018 | 0.995 | 0.992 | 0.999 | 0.0178 |
| AC109460.3 | 0.0004 | -0.00715 | 0.0029 | 0.992 | 0.987 | 0.998 | 0.0152 |
| AC004477.1 | 0.0138 | -0.00836 | 0.0032 | 0.991 | 0.985 | 0.998 | 0.0104 |
| AC015911.3 | 0.0018 | -0.021   | 0.0078 | 0.979 | 0.964 | 0.994 | 0.0075 |
| AC074044.1 | 0.0014 | -0.03786 | 0.0126 | 0.962 | 0.939 | 0.986 | 0.0026 |
| AGBL5-IT1  | 0.0332 | -0.02777 | 0.0085 | 0.972 | 0.956 | 0.988 | 0.0010 |
| AC024361.1 | 0.0047 | -0.0141  | 0.0055 | 0.985 | 0.975 | 0.996 | 0.0103 |

---

---

|            |        |          |        |       |       |       |        |
|------------|--------|----------|--------|-------|-------|-------|--------|
| AC084018.2 | 0.0400 | -0.00768 | 0.0038 | 0.992 | 0.984 | 0.999 | 0.0447 |
| AC020663.2 | 0.0007 | -0.01778 | 0.0055 | 0.982 | 0.971 | 0.993 | 0.0012 |
| AC013468.1 | 0.0011 | -0.04468 | 0.0161 | 0.956 | 0.926 | 0.986 | 0.0055 |
| AF131215.5 | 0.0281 | -0.00261 | 0.0010 | 0.997 | 0.995 | 0.999 | 0.0169 |
| Z84485.1   | 0.0015 | -0.01182 | 0.0038 | 0.988 | 0.980 | 0.995 | 0.0020 |
| AC109449.1 | 0.0359 | -0.01886 | 0.0063 | 0.981 | 0.969 | 0.993 | 0.0027 |
| UBE2Q1-AS1 | 0.0001 | -0.03887 | 0.0122 | 0.961 | 0.938 | 0.985 | 0.0015 |
| AL390728.6 | 2.15E- | -0.00165 | 0.0003 | 0.998 | 0.997 | 0.999 | 5.65E- |
| AL139349.1 | 0.0007 | -0.01208 | 0.0041 | 0.987 | 0.979 | 0.996 | 0.0036 |
| AC019131.2 | 0.0031 | -0.00975 | 0.0028 | 0.990 | 0.984 | 0.995 | 0.0005 |
| AC006026.3 | 0.0362 | -0.01579 | 0.0069 | 0.984 | 0.970 | 0.997 | 0.0235 |

---

---

|            |        |          |        |       |       |       |        |
|------------|--------|----------|--------|-------|-------|-------|--------|
| AC048341.2 | 0.0002 | -0.00717 | 0.0026 | 0.992 | 0.987 | 0.998 | 0.0067 |
| AC108134.4 | 0.0013 | -0.02877 | 0.0123 | 0.971 | 0.948 | 0.995 | 0.0202 |
| AC026801.2 | 0.0425 | -0.00311 | 0.0010 | 0.996 | 0.994 | 0.999 | 0.0044 |
| AC126118.1 | 0.0032 | -0.02355 | 0.0096 | 0.976 | 0.958 | 0.995 | 0.0145 |
| AC100814.1 | 0.0419 | -0.00997 | 0.0028 | 0.990 | 0.984 | 0.995 | 0.0003 |
| AC008124.1 | 0.0007 | -0.00075 | 0.0002 | 0.999 | 0.998 | 0.999 | 0.0022 |
| AL158835.2 | 0.0134 | -0.0365  | 0.0183 | 0.964 | 0.930 | 0.999 | 0.0463 |
| AC005224.1 | 0.0162 | -0.01199 | 0.0060 | 0.988 | 0.976 | 0.999 | 0.0473 |
| AC011451.1 | 0.0318 | -0.00864 | 0.0035 | 0.991 | 0.984 | 0.998 | 0.0137 |
| AL391244.3 | 0.0133 | -0.00206 | 0.0009 | 0.997 | 0.996 | 0.999 | 0.0286 |
| AL022328.1 | 0.0037 | -0.01343 | 0.0054 | 0.986 | 0.976 | 0.997 | 0.0145 |

---

---

|             |        |          |        |       |       |       |        |
|-------------|--------|----------|--------|-------|-------|-------|--------|
| AC009237.15 | 0.0273 | -0.01055 | 0.0036 | 0.989 | 0.982 | 0.996 | 0.0038 |
| GATA2-AS1   | 0.0051 | -0.0007  | 0.0002 | 0.999 | 0.998 | 0.999 | 0.0045 |
| LINC01841   | 0.0090 | -0.06542 | 0.0293 | 0.936 | 0.884 | 0.992 | 0.0260 |
| AC072061.1  | 0.0104 | -0.00587 | 0.0028 | 0.994 | 0.988 | 0.999 | 0.0366 |
| AC092747.4  | 0.0031 | -0.00111 | 0.0004 | 0.998 | 0.998 | 0.999 | 0.0066 |
| ZNF460-AS1  | 0.0001 | -0.02221 | 0.0056 | 0.978 | 0.967 | 0.988 | 7.48E- |
| AL136295.2  | 5.79E- | -0.02688 | 0.0064 | 0.973 | 0.961 | 0.985 | 2.86E- |
| RGMB-AS1    | 0.0332 | -0.00404 | 0.0019 | 0.995 | 0.992 | 0.999 | 0.0420 |
| CCDC18-AS1  | 0.0249 | -0.00071 | 0.0002 | 0.999 | 0.998 | 0.999 | 0.0123 |
| AC007881.2  | 0.0316 | -0.13807 | 0.0602 | 0.871 | 0.773 | 0.980 | 0.0219 |
| C17orf82    | 0.0041 | -0.00219 | 0.0009 | 0.997 | 0.995 | 0.999 | 0.0229 |

---



---

|             |        |          |        |       |       |       |        |
|-------------|--------|----------|--------|-------|-------|-------|--------|
| AL135999.1  | 0.0223 | -0.00251 | 0.0009 | 0.997 | 0.995 | 0.999 | 0.0067 |
| AC055713.1  | 0.0004 | -0.00323 | 0.0010 | 0.996 | 0.994 | 0.998 | 0.0031 |
| AC104825.1  | 3.60E- | -0.0012  | 0.0003 | 0.998 | 0.998 | 0.999 | 0.0001 |
| AC068620.2  | 0.0001 | -0.02976 | 0.0086 | 0.970 | 0.954 | 0.987 | 0.0005 |
| AC009065.4  | 0.0027 | -0.00725 | 0.0023 | 0.992 | 0.988 | 0.997 | 0.0017 |
| AL122010.1  | 0.0081 | -0.00603 | 0.0024 | 0.993 | 0.989 | 0.998 | 0.0125 |
| AC080129.2  | 0.0004 | -0.01909 | 0.0073 | 0.981 | 0.967 | 0.995 | 0.0093 |
| AC128687.2  | 0.0154 | -0.03751 | 0.0184 | 0.963 | 0.928 | 0.998 | 0.0425 |
| BDNF-AS     | 0.0198 | -0.00479 | 0.0016 | 0.995 | 0.991 | 0.998 | 0.0042 |
| ANKRD10-IT1 | 0.0068 | -0.00094 | 0.0004 | 0.999 | 0.998 | 0.999 | 0.0423 |
| AL137244.1  | 2.12E- | -0.02879 | 0.0091 | 0.971 | 0.954 | 0.989 | 0.0015 |

---

---

|            |        |          |        |       |       |       |        |
|------------|--------|----------|--------|-------|-------|-------|--------|
| ALOX12-AS1 | 0.0205 | -0.00382 | 0.0013 | 0.996 | 0.993 | 0.998 | 0.0044 |
| AC026471.4 | 0.0006 | -0.00439 | 0.0017 | 0.995 | 0.992 | 0.999 | 0.0125 |
| USP30-AS1  | 0.0296 | -0.0048  | 0.0014 | 0.995 | 0.992 | 0.998 | 0.0012 |
| AC245052.4 | 0.0222 | -0.00463 | 0.0021 | 0.995 | 0.991 | 0.999 | 0.0275 |
| AL590705.3 | 0.0160 | -0.01401 | 0.0059 | 0.986 | 0.974 | 0.997 | 0.0181 |
| AC011477.3 | 0.0178 | -0.00617 | 0.0024 | 0.993 | 0.989 | 0.998 | 0.0105 |
| AC005841.1 | 0.0014 | -0.06359 | 0.0230 | 0.938 | 0.896 | 0.981 | 0.0057 |
| AC024267.3 | 0.0203 | -0.02218 | 0.0088 | 0.978 | 0.961 | 0.995 | 0.0123 |
| AL031432.3 | 0.0001 | -0.03765 | 0.0142 | 0.963 | 0.936 | 0.990 | 0.0082 |
| AL022069.1 | 0.0479 | -0.03847 | 0.0178 | 0.962 | 0.929 | 0.996 | 0.0307 |
| AC105345.1 | 0.0072 | -0.01032 | 0.0027 | 0.989 | 0.984 | 0.995 | 0.0001 |

---

---

|            |        |          |        |       |       |       |        |
|------------|--------|----------|--------|-------|-------|-------|--------|
| RPARP-AS1  | 0.0393 | -0.00061 | 0.0002 | 0.999 | 0.998 | 0.999 | 0.0135 |
| AC011477.2 | 0.0023 | -0.00418 | 0.0012 | 0.995 | 0.993 | 0.998 | 0.0007 |
| AL355581.1 | 0.0057 | -0.06724 | 0.0229 | 0.934 | 0.893 | 0.977 | 0.0033 |
| LINC01011  | 0.0008 | -0.00492 | 0.0013 | 0.995 | 0.992 | 0.997 | 0.0002 |
| AC097505.1 | 0.0158 | -0.09374 | 0.0348 | 0.910 | 0.850 | 0.974 | 0.0072 |
| AC009118.3 | 0.0016 | -0.00671 | 0.0028 | 0.993 | 0.987 | 0.998 | 0.0184 |
| AL121601.1 | 0.0017 | -0.0201  | 0.0076 | 0.980 | 0.965 | 0.994 | 0.0088 |
| HCG18      | 0.0063 | -0.00034 | 0.0001 | 0.999 | 0.999 | 0.999 | 0.0154 |
| AL355297.3 | 0.0018 | -0.08485 | 0.0318 | 0.918 | 0.862 | 0.977 | 0.0078 |
| AC055855.1 | 0.0210 | -0.01928 | 0.0092 | 0.980 | 0.963 | 0.998 | 0.0378 |
| AC005387.1 | 0.0013 | -0.03935 | 0.0104 | 0.961 | 0.941 | 0.981 | 0.0001 |

---

---

|            |        |          |        |       |       |       |        |
|------------|--------|----------|--------|-------|-------|-------|--------|
| AL671710.1 | 0.0073 | -0.01403 | 0.0042 | 0.986 | 0.977 | 0.994 | 0.0008 |
| AP001462.1 | 0.0037 | -0.02944 | 0.0100 | 0.970 | 0.952 | 0.990 | 0.0033 |
| ATP2B1-AS1 | 0.0390 | -0.00278 | 0.0013 | 0.997 | 0.994 | 0.999 | 0.0322 |
| BX640514.2 | 0.0411 | -0.0194  | 0.0090 | 0.980 | 0.963 | 0.998 | 0.0311 |
| AC110769.2 | 0.0100 | -0.03989 | 0.0142 | 0.960 | 0.934 | 0.988 | 0.0050 |
| MCCC1-AS1  | 0.0088 | -0.00587 | 0.0028 | 0.994 | 0.988 | 0.999 | 0.0362 |
| SNHG20     | 0.0194 | -0.00158 | 0.0004 | 0.998 | 0.997 | 0.999 | 0.0006 |
| SRD5A3-AS1 | 0.0272 | -0.00501 | 0.0018 | 0.995 | 0.991 | 0.998 | 0.0056 |
| AL132657.1 | 0.0358 | -0.01965 | 0.0077 | 0.980 | 0.965 | 0.995 | 0.0111 |
| AC010186.3 | 0.0296 | -0.00183 | 0.0006 | 0.998 | 0.996 | 0.999 | 0.0046 |
| AC008735.2 | 0.0003 | -0.00348 | 0.0011 | 0.996 | 0.994 | 0.998 | 0.0020 |

---

---

|             |        |          |        |       |       |       |        |
|-------------|--------|----------|--------|-------|-------|-------|--------|
| H1FX-AS1    | 0.0064 | -0.00188 | 0.0007 | 0.998 | 0.996 | 0.999 | 0.0145 |
| ARHGAP5-AS1 | 0.0491 | 0.00114  | 0.0004 | 1.001 | 1.000 | 1.002 | 0.0107 |
| AC016705.2  | 0.0038 | -0.00253 | 0.0012 | 0.997 | 0.995 | 0.999 | 0.0444 |
| PPP3CB-AS1  | 0.0082 | -0.00141 | 0.0005 | 0.998 | 0.997 | 0.999 | 0.0167 |
| AL138921.1  | 0.0092 | -0.05002 | 0.0144 | 0.951 | 0.924 | 0.978 | 0.0005 |
| AC025766.1  | 0.0235 | -0.05577 | 0.0234 | 0.945 | 0.903 | 0.990 | 0.0174 |
| AL139011.1  | 0.0006 | -0.01507 | 0.0065 | 0.985 | 0.972 | 0.997 | 0.0221 |
| NNT-AS1     | 0.0181 | -0.00039 | 0.0001 | 0.999 | 0.999 | 0.999 | 0.0121 |
| GUSBP11     | 6.97E- | -0.009   | 0.0021 | 0.991 | 0.986 | 0.995 | 1.89E- |
| ASB16-AS1   | 0.0327 | -0.00071 | 0.0002 | 0.999 | 0.998 | 0.999 | 0.0149 |
| GPRC5D-AS1  | 0.0263 | -0.00093 | 0.0004 | 0.999 | 0.998 | 0.999 | 0.0422 |

---

---

|            |        |          |        |       |       |       |        |
|------------|--------|----------|--------|-------|-------|-------|--------|
| LINC01089  | 6.79E- | -0.00049 | 0.0002 | 0.999 | 0.999 | 0.999 | 0.0165 |
| AC013731.1 | 0.0023 | -0.02676 | 0.0075 | 0.973 | 0.959 | 0.988 | 0.0004 |
| AC015802.4 | 0.0002 | -0.02642 | 0.0072 | 0.973 | 0.960 | 0.987 | 0.0002 |
| LINC01355  | 0.0001 | -0.001   | 0.0003 | 0.999 | 0.998 | 0.999 | 0.0012 |
| AC018766.1 | 0.0006 | -0.0286  | 0.0110 | 0.971 | 0.950 | 0.993 | 0.0099 |
| AC005261.3 | 0.0005 | -0.00249 | 0.0006 | 0.997 | 0.996 | 0.998 | 5.57E- |
| AC040162.3 | 0.0149 | -0.0055  | 0.0019 | 0.994 | 0.990 | 0.998 | 0.0058 |

---
