# Supplementary material for: A prognostic risk prediction model based on ferroptosis-related long non-coding RNAs in bladder cancer: A bulk RNA-seq research and scRNA-seq validation
Source: PubMed Central journal article supplement — Medicine (Baltimore). 2022 Dec 23;101(51):e32558. doi: 10.1097/MD.0000000000032558 (PMC9794272; doi:10.1097/md.0000000000032558), 2022-12-23
Supplement: medi-101-e32558-s003.pdf [file medi-101-e32558-s003.pdf]

**Table S3. Results of univariate Cox analysis based on clinical characteristics and risk score of samples.**

| Variable   | B        | SE       | Z        | HR       | HR. 95L  | HR. 95H  | <i>P</i> value |
|------------|----------|----------|----------|----------|----------|----------|----------------|
| Age        | 0.019611 | 0.005495 | 3.569115 | 1.019805 | 1.008881 | 1.030847 | 0.000358       |
| Gender     | 0.034296 | 0.17268  | 0.198608 | 1.03489  | 0.73775  | 1.45171  | 0.842569       |
| Stage      | 0.387045 | 0.097182 | 3.982678 | 1.472623 | 1.217223 | 1.781613 | 6.81E-05       |
| T          | 0.368358 | 0.077149 | 4.774609 | 1.445359 | 1.242528 | 1.681301 | 1.80E-06       |
| M          | 0.540633 | 0.456991 | 1.183027 | 1.717093 | 0.701136 | 4.205187 | 0.236799       |
| N          | 0.366769 | 0.080041 | 4.582278 | 1.443064 | 1.233544 | 1.68817  | 4.60E-06       |
| Risk Score | 0.316653 | 0.041376 | 7.653117 | 1.372526 | 1.265615 | 1.488468 | 1.96E-14       |
