# Supplementary material for: A prognostic risk prediction model based on ferroptosis-related long non-coding RNAs in bladder cancer: A bulk RNA-seq research and scRNA-seq validation
Source: PubMed Central journal article supplement — Medicine (Baltimore). 2022 Dec 23;101(51):e32558. doi: 10.1097/MD.0000000000032558 (PMC9794272; doi:10.1097/md.0000000000032558), 2022-12-23
Supplement: medi-101-e32558-s004.pdf [file medi-101-e32558-s004.pdf]

Table S4. The top 20 results of low-risk group analyzed by GO.

| I<br>D | GS<br>follow link to MSigDB                                                                            | S<br>I<br>Z<br>E | E<br>S           | N<br>E<br>S       | N<br>O<br>M<br>p-<br>v<br>al | F<br>O<br>R<br>q-<br>v<br>al | F<br>W<br>E<br>R<br>p-<br>va<br>l | R<br>A<br>N<br>K<br>A<br>T<br>M<br>A<br>X |
|--------|--------------------------------------------------------------------------------------------------------|------------------|------------------|-------------------|------------------------------|------------------------------|-----------------------------------|-------------------------------------------|
| 1      | <a href="#">GOBP_CORNIFICATION</a>                                                                     | 1<br>1<br>2      | 0<br>.<br>7<br>6 | 2.<br>1<br>1      | 0.<br>0<br>0<br>2            | 0.<br>0<br>2                 | 0.<br>06<br>4                     | 29<br>91                                  |
| 2      | <a href="#">GOCC_CORNIFIED_ENVELOPE</a>                                                                | 4<br>4           | 0<br>.<br>8<br>5 | 2.<br>0<br>7      | 0<br>0                       | 0.<br>0<br>2<br>1            | 0.<br>10<br>2                     | 21<br>19                                  |
| 3      | <a href="#">GOMF_EXTRACELLULAR_MATRIX_S<br/>TRUCTURAL_CONSTITUENT_CONFER<br/>RING_TENSILE_STRENGTH</a> | 4<br>1           | 0<br>.<br>6<br>9 | 1.<br>9           | 0.<br>0<br>0<br>8            | 0.<br>2<br>2<br>6            | 0.<br>41<br>7                     | 24<br>84                                  |
| 4      | <a href="#">GOBP_PEPTIDE_CROSS_LINKING</a>                                                             | 3<br>4           | 0<br>.<br>6<br>4 | 1.<br>8<br>2<br>7 | 0.<br>0<br>1<br>7            | 0.<br>0<br>4<br>7<br>5       | 0.<br>59                          | 27<br>31                                  |
| 5      | <a href="#">GOBP_CELL_AGGREGATION</a>                                                                  | 2<br>2           | 0<br>.<br>6<br>4 | 1.<br>8<br>1      | 0.<br>0<br>0<br>8            | 0.<br>0<br>4<br>1<br>4       | 0.<br>61<br>4                     | 54<br>98                                  |
| 6      | <a href="#">GOCC_COMPLEX_OF_COLLAGEN_TRI<br/>MERS</a>                                                  | 2<br>1           | 0<br>.<br>7<br>3 | 1.<br>7<br>9<br>2 | 0.<br>0<br>2<br>2            | 0.<br>0<br>4<br>5<br>6       | 0.<br>65<br>2                     | 15<br>57                                  |
| 7      | <a href="#">GOBP_COLLAGEN_FIBRIL_ORGANIZ<br/>ATION</a>                                                 | 5<br>3           | 0<br>.<br>6      | 1.<br>7<br>8      | 0.<br>0<br>3                 | 0.<br>0<br>4<br>0            | 0.<br>65<br>9                     | 43<br>95                                  |

|        |                                                                                                    |             |        |         |         |         |          |          |
|--------|----------------------------------------------------------------------------------------------------|-------------|--------|---------|---------|---------|----------|----------|
|        |                                                                                                    |             | 5      |         | 8       | 6       |          |          |
| 8      | <a href="#">GOBP_NEGATIVE_REGULATION_OF_CARTILAGE_DEVELOPMENT</a>                                  | 2<br>5      | 0<br>. | 1.<br>7 | 0.<br>0 | 0.<br>8 | 0.<br>78 | 47<br>55 |
|        |                                                                                                    |             | 5<br>7 |         | 2<br>9  | 0<br>9  |          |          |
| 9      | <a href="#">GOBP_PULMONARY_VALVE_MORPHOGENESIS</a>                                                 | 1<br>7      | 0<br>. | 1.<br>6 | 0.<br>0 | 0.<br>7 | 0.<br>79 | 53<br>18 |
|        |                                                                                                    |             | 6<br>4 | 9<br>6  | 1<br>6  | 5<br>6  | 5        |          |
| 1<br>0 | <a href="#">GOMF_EXTRACELLULAR_MATRIX_STRUCTURAL_CONSTITUENT_CONFERRING_COMPRESSION_RESISTANCE</a> | 2<br>2      | 0<br>. | 1.<br>6 | 0.<br>0 | 0.<br>7 | 0.<br>80 | 23<br>92 |
|        |                                                                                                    |             | 6<br>2 | 9<br>3  | 3<br>2  | 2<br>5  | 3        |          |
| 1<br>1 | <a href="#">GOMF_EXTRACELLULAR_MATRIX_STRUCTURAL_CONSTITUENT</a>                                   | 1<br>6<br>9 | 0<br>. | 1.<br>6 | 0.<br>0 | 0.<br>6 | 0.<br>80 | 43<br>95 |
|        |                                                                                                    |             | 5<br>2 | 8<br>4  | 4<br>6  | 8<br>6  | 7        |          |
| 1<br>2 | <a href="#">GOBP_KERATINIZATION</a>                                                                | 2<br>2<br>3 | 0<br>. | 1.<br>6 | 0.<br>0 | 0.<br>7 | 0.<br>81 | 51<br>25 |
|        |                                                                                                    |             | 6<br>6 | 7<br>4  | 0<br>5  | 0<br>5  | 9        |          |
| 1<br>3 | <a href="#">GOMF_COLLAGEN_BINDING</a>                                                              | 6<br>8      | 0<br>. | 1.<br>6 | 0.<br>0 | 0.<br>8 | 0.<br>86 | 34<br>28 |
|        |                                                                                                    |             | 5<br>6 | 3<br>8  | 7<br>3  | 8<br>3  | 9        |          |
| 1<br>4 | <a href="#">GOBP_KERATINOCYTE_DIFFERENTIATION</a>                                                  | 2<br>9<br>7 | 0<br>. | 1.<br>5 | 0.<br>0 | 1<br>2  | 0.<br>91 | 51<br>25 |
|        |                                                                                                    |             | 5<br>5 | 9<br>2  | 2<br>5  |         | 8        |          |
| 1<br>5 | <a href="#">GOBP_GLOMERULAR_MESANGIUM_DEVELOPMENT</a>                                              | 1<br>6      | 0<br>. | 1.<br>5 | 0.<br>0 | 1<br>4  | 0.<br>92 | 42<br>41 |
|        |                                                                                                    |             | 6<br>2 | 8<br>5  | 5<br>5  |         | 4        |          |
| 1<br>6 | <a href="#">GOMF_FIBROBLAST_GROWTH_FACTOR_RECEPTOR_BINDING</a>                                     | 2<br>5      | 0<br>. | 1.<br>5 | 0.<br>0 | 1<br>4  | 0.<br>93 | 57<br>36 |
|        |                                                                                                    |             | 5<br>7 | 7<br>8  | 4<br>8  |         | 4        |          |
| 1<br>7 | <a href="#">GOBP_CELL_SURFACE_RECEPTOR_SIGNALING_PATHWAY_INVOLVED_IN_HEART_DEVELOPMENT</a>         | 2<br>8      | 0<br>. | 1.<br>5 | 0.<br>0 | 1<br>3  | 0.<br>94 | 48<br>48 |
|        |                                                                                                    |             | 5<br>2 | 6<br>3  | 6<br>3  |         | 3        |          |
| 1<br>8 | <a href="#">GOBP_CHONDROCYTE_DEVELOPMENT</a>                                                       | 2<br>7      | 0<br>. | 1.<br>5 | 0.<br>0 | 1<br>9  | 0.<br>96 | 27<br>82 |
|        |                                                                                                    |             | 5<br>5 | 1<br>9  |         |         | 8        |          |

|        |                                        |             |                  |                   |                   |   |               |          |
|--------|----------------------------------------|-------------|------------------|-------------------|-------------------|---|---------------|----------|
|        |                                        |             | 3                |                   | 2                 |   |               |          |
| 1<br>9 | <a href="#">GOCC_BASEMENT_MEMBRANE</a> | 9<br>4      | 0<br>.<br>4<br>6 | 1.<br>5<br>1<br>8 | 0.<br>0<br>8<br>7 | 1 | 0.<br>97<br>1 | 53<br>79 |
| 2<br>0 | <a href="#">GOBP_SKIN_DEVELOPMENT</a>  | 4<br>1<br>0 | 0<br>.<br>4<br>6 | 1.<br>5<br>5      | 0.<br>0<br>9      | 1 | 0.<br>97<br>4 | 48<br>63 |
