# Supplementary material for: A prognostic risk prediction model based on ferroptosis-related long non-coding RNAs in bladder cancer: A bulk RNA-seq research and scRNA-seq validation
Source: PubMed Central journal article supplement — Medicine (Baltimore). 2022 Dec 23;101(51):e32558. doi: 10.1097/MD.0000000000032558 (PMC9794272; doi:10.1097/md.0000000000032558), 2022-12-23
Supplement: medi-101-e32558-s005.pdf [file medi-101-e32558-s005.pdf]

Table S5. The top 20 results of high-risk group analyzed by KEGG.

|   | GS<br>follow link to MSigDB                              | GS DETAILS                  | SIZE | ES        | NES       | NOM<br>p-val | FDR<br>q-val | FWER<br>p-val | RANK<br>AT<br>MAX | LEADING EDGE                         |
|---|----------------------------------------------------------|-----------------------------|------|-----------|-----------|--------------|--------------|---------------|-------------------|--------------------------------------|
| 1 | <a href="#">KEGG PARKINSONS DISEASE</a>                  | <a href="#">Details ...</a> | 127  | -<br>0.64 | -1.9      | 0.012        | 0.353        | 0.108         | 12522             | tags=68%,<br>list=23%,<br>signal=87% |
| 2 | <a href="#">KEGG OXIDATIVE PHOSPHORYLATION</a>           | <a href="#">Details ...</a> | 131  | -<br>0.63 | -<br>1.86 | 0.014        | 0.269        | 0.146         | 12522             | tags=66%,<br>list=23%,<br>signal=86% |
| 3 | <a href="#">KEGG ALZHEIMERS DISEASE</a>                  | <a href="#">Details ...</a> | 165  | -<br>0.58 | -<br>1.85 | 0.008        | 0.201        | 0.158         | 12044             | tags=53%,<br>list=22%,<br>signal=67% |
| 4 | <a href="#">KEGG PEROXISOME</a>                          | <a href="#">Details ...</a> | 78   | -<br>0.59 | -<br>1.81 | 0.008        | 0.215        | 0.19          | 12401             | tags=60%,<br>list=22%,<br>signal=78% |
| 5 | <a href="#">KEGG ANTIGEN PROCESSING AND PRESENTATION</a> | <a href="#">Details ...</a> | 81   | -<br>0.62 | -<br>1.77 | 0.041        | 0.249        | 0.227         | 8404              | tags=47%,<br>list=15%,<br>signal=55% |

|    |                                                    |                             |     |           |           |       |       |       |       |                                       |
|----|----------------------------------------------------|-----------------------------|-----|-----------|-----------|-------|-------|-------|-------|---------------------------------------|
| 6  | <a href="#">KEGG TYROSINE METABOLISM</a>           | <a href="#">Details ...</a> | 42  | -<br>0.54 | -<br>1.77 | 0.008 | 0.22  | 0.235 | 13348 | tags=45%,<br>list=24%,<br>signal=60%  |
| 7  | <a href="#">KEGG HUNTINGTONS DISEASE</a>           | <a href="#">Details ...</a> | 180 | -<br>0.56 | -<br>1.73 | 0.022 | 0.257 | 0.288 | 19813 | tags=76%,<br>list=36%,<br>signal=117% |
| 8  | <a href="#">KEGG CYTOSOLIC DNA SENSING PATHWAY</a> | <a href="#">Details ...</a> | 54  | -<br>0.55 | -<br>1.73 | 0.017 | 0.239 | 0.299 | 14740 | tags=50%,<br>list=27%,<br>signal=68%  |
| 9  | <a href="#">KEGG SELENOAMINO ACID METABOLISM</a>   | <a href="#">Details ...</a> | 25  | -<br>0.64 | -<br>1.72 | 0.006 | 0.231 | 0.311 | 12798 | tags=60%,<br>list=23%,<br>signal=78%  |
| 10 | <a href="#">KEGG FATTY ACID METABOLISM</a>         | <a href="#">Details ...</a> | 42  | -<br>0.56 | -<br>1.71 | 0.022 | 0.218 | 0.315 | 17130 | tags=60%,<br>list=31%,<br>signal=86%  |
| 11 | <a href="#">KEGG CARDIAC MUSCLE CONTRACTION</a>    | <a href="#">Details ...</a> | 78  | -0.5      | -<br>1.66 | 0.025 | 0.297 | 0.391 | 7208  | tags=31%,<br>list=13%,<br>signal=35%  |
| 12 | <a href="#">KEGG AMINOACYL TRNA BIOSYNTHESIS</a>   | <a href="#">Details ...</a> | 22  | -<br>0.69 | -<br>1.66 | 0.028 | 0.282 | 0.397 | 14571 | tags=82%,<br>list=26%,<br>signal=111% |
| 13 | <a href="#">KEGG GLYCEROLIPID METABOLISM</a>       | <a href="#">Details ...</a> | 49  | -<br>0.49 | -<br>1.64 | 0.014 | 0.29  | 0.416 | 7875  | tags=33%,<br>list=14%,<br>signal=38%  |

|    |                                                                |                             |     |           |           |       |       |       |       |                                       |
|----|----------------------------------------------------------------|-----------------------------|-----|-----------|-----------|-------|-------|-------|-------|---------------------------------------|
| 14 | <a href="#">KEGG GLYCEROPHOSPHOLIPID METABOLISM</a>            | <a href="#">Details ...</a> | 77  | -<br>0.48 | -<br>1.63 | 0.018 | 0.293 | 0.435 | 9299  | tags=39%,<br>list=17%,<br>signal=47%  |
| 15 | <a href="#">KEGG BASE EXCISION REPAIR</a>                      | <a href="#">Details ...</a> | 35  | -<br>0.62 | -<br>1.63 | 0.047 | 0.286 | 0.449 | 17759 | tags=83%,<br>list=32%,<br>signal=122% |
| 16 | <a href="#">KEGG RNA DEGRADATION</a>                           | <a href="#">Details ...</a> | 59  | -<br>0.61 | -<br>1.62 | 0.026 | 0.275 | 0.455 | 14398 | tags=71%,<br>list=26%,<br>signal=96%  |
| 17 | <a href="#">KEGG SPLICEOSOME</a>                               | <a href="#">Details ...</a> | 127 | -<br>0.63 | -<br>1.61 | 0.044 | 0.279 | 0.472 | 15696 | tags=79%,<br>list=28%,<br>signal=110% |
| 18 | <a href="#">KEGG HISTIDINE METABOLISM</a>                      | <a href="#">Details ...</a> | 29  | -<br>0.51 | -1.6      | 0.024 | 0.283 | 0.485 | 11597 | tags=38%,<br>list=21%,<br>signal=48%  |
| 19 | <a href="#">KEGG RIG I LIKE RECEPTOR SIGNALING PATHWAY</a>     | <a href="#">Details ...</a> | 70  | -0.5      | -<br>1.59 | 0.052 | 0.287 | 0.5   | 22460 | tags=69%,<br>list=41%,<br>signal=115% |
| 20 | <a href="#">KEGG SNARE INTERACTIONS IN VESICULAR TRANSPORT</a> | <a href="#">Details ...</a> | 38  | -<br>0.58 | -<br>1.58 | 0.059 | 0.284 | 0.509 | 19450 | tags=79%,<br>list=35%,<br>signal=122% |
