# Supplementary figures and images for: A prognostic risk prediction model based on ferroptosis-related long non-coding RNAs in bladder cancer: A bulk RNA-seq research and scRNA-seq validation
Source: PubMed Central journal article supplement — Medicine (Baltimore). 2022 Dec 23;101(51):e32558. doi: 10.1097/MD.0000000000032558 (PMC9794272; doi:10.1097/md.0000000000032558), 2022-12-23

Supplementary Figure 1. The expression of cell markers in different cell clusters

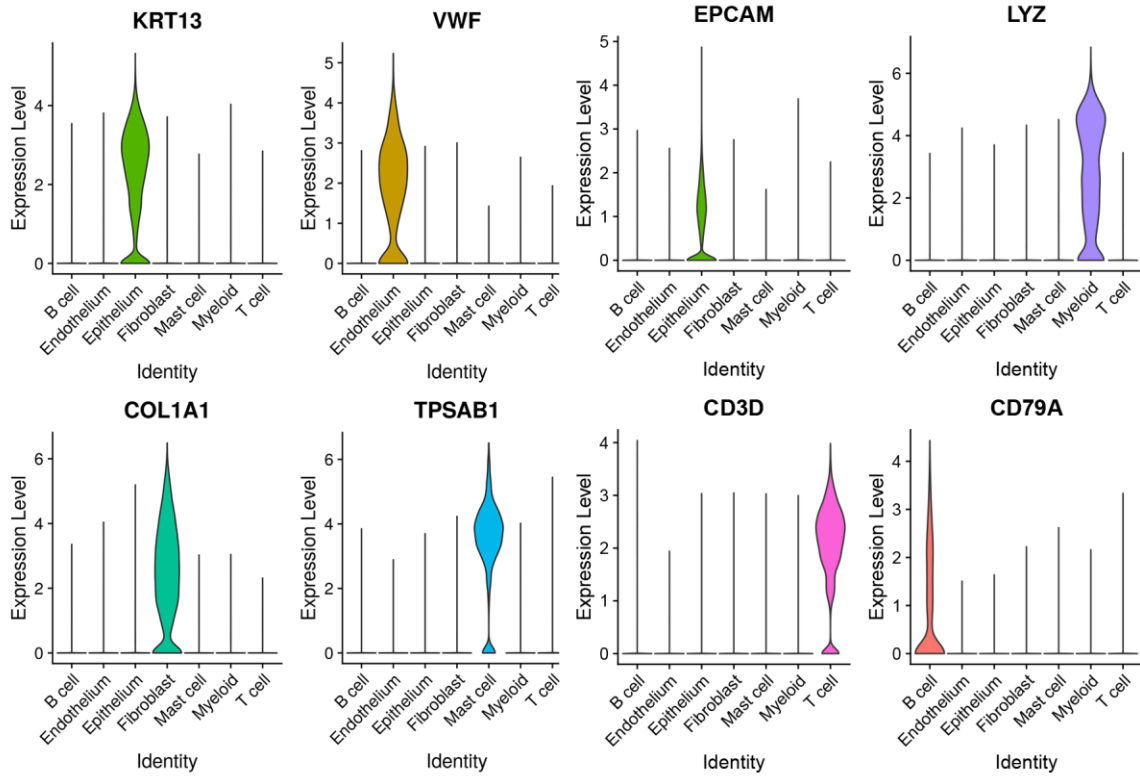

Supplement: medi-101-e32558-s006.pdf [file medi-101-e32558-s006.pdf]
